# Supplementary material
Source: publisher site journal article supplement (https://www.dovepress.com/article/421299)
Supplement: Supplementary file 1 [file get_supplementary_file.php]

Table S1 PPPASI

|  | Score | | | | | | |
| --- | --- | --- | --- | --- | --- | --- | --- |
| 0 | 1 | 2 | 3 | 4 | 5 | 6 |
| Erythema (E) | None | Slight | Moderate | Severe | Very  severe |  |  |
| Pustules (P) | None | Slight | Moderate | Severe | Very severe |  |  |
| Desquamation (D) | None | Slight | Moderate | Severe | Very severe |  |  |
| Area affected (%) (A) | 0 | <10 | 10–<30 | 30–<50 | 50–<70 | 70–<90 | 90–100 |

PPP ASI Palmoplantar Pustular Psoriasis Area and Severity Index

Table S2 PPP PGA scale

| Score | Description | Detailed description |
| --- | --- | --- |
| 0 | Clear | No signs of PPP; no scaling or crusts or pustules remain |
| 1 | Almost clear | Slight scaling and/or erythema and/or slight crusts; very few new (yellow) and/or old (brown) pustules |
| 2 | Mild | Scaling and/or erythema and/or crusts; visible new (yellow) and/or old (brown) pustules of limited number and extent |
| 3 | Moderate | Prominent scaling and/or erythema and/or crusting; prominent new (yellow) and/or old (brown) pustules covering most of the area involved |
| 4 | Severe | Severe scaling and/or erythema and/or crusting; numerous new (yellow) or old (brown) pustules with and/or without major confluence covering the entire area of at least two palmoplantar surfaces |

PPP palmoplantar pustulosis, PPP PGA Palmoplantar Pustulosis Physician Global Assessment
